# Supplementary material for: Chronological brain lesions after SARS-CoV-2 infection in hACE2-transgenic mice
Source: PubMed Central journal article supplement (PMC9207990; doi:10.1177/03009858211066841), 2021-12-27
Supplement: sj-pdf-1-vet-10.1177_03009858211066841.pdf [file sj-pdf-1-vet-10.1177_03009858211066841.pdf]

*Veterinary Pathology*: Supplemental Materials  
 Vidal et al. Chronological brain lesions after SARS-CoV-2 infection in hACE2-transgenic mice.

Supplemental Table S1: Immunohistochemical procedure details.

| Primary Antibodies                     | Commercial reference               | Dilution of primary antibody | Antigen retrieval and other treatments                                                                                                                                            | Incubation of primary antibody | Visualization system                                                                                                                                                                                                         |
|----------------------------------------|------------------------------------|------------------------------|-----------------------------------------------------------------------------------------------------------------------------------------------------------------------------------|--------------------------------|------------------------------------------------------------------------------------------------------------------------------------------------------------------------------------------------------------------------------|
| <b>SARS-CoV-2 NP</b> rabbit monoclonal | Sino Biological (40143-R019)       | 1:15000                      | Peroxidase block (Methanol 3% H <sub>2</sub> O <sub>2</sub> 30 min RT)<br><br>HIER Citrat Buffer pH6 (Dako Target Retrieval Solution) 98°C 20 min + 30 min RT                     | Overnight 4°C                  | EnVision®+ System linked to horseradish peroxidase (HRP, Agilent-Dako) and 3,3'-diaminobenzidine (DAB)                                                                                                                       |
| <b>GFAP</b> rabbit polyclonal          | Dako (Z0334)                       | 1:2000                       | Peroxidase block (3% H <sub>2</sub> O <sub>2</sub> in H <sub>2</sub> O 35 min RT)<br><br>HIER citrate buffer, 0.01M pH6, 98°C 20 min + 30 min RT                                  | Overnight 4°C                  | EnVision®+ System linked to horseradish peroxidase (HRP, Agilent-Dako) and DAB.                                                                                                                                              |
| <b>IBA1</b> goat polyclonal            | ABCAM (ab5076)                     | 1:300                        | Peroxidase block (3% peroxide hydrogen in H <sub>2</sub> O 35 min RT)<br><br>HIER citrate buffer, 0.01M pH6, 98°C 20min + 30 min RT                                               | Overnight 4°C                  | Polyclonal rabbit anti-goat biotinylated secondary antibody (DAKO, 1:200) with the ABC Peroxidase Standard Staining Kit (Thermo Scientific™) and DAB                                                                         |
| <b>CD3</b> rabbit monoclonal           | Cell Signalling (clone D4V8L)      | 1:500                        | Peroxidase block (Methanol 3% H <sub>2</sub> O <sub>2</sub> 30 min TA)<br><br>HIER EDTA Buffer pH9 (Dako EnVision FLEX Target Retrieval Solution High pH) 98°C 20 min + 30 min RT | Overnight 4°C                  | EnVision®+ System linked to horseradish peroxidase (HRP, Agilent-Dako) and DAB.                                                                                                                                              |
| <b>CD20</b> goat polyclonal            | Santa Cruz Biotechnology (SC-7735) | 1:250                        | Alkaline Phosphatase block (Bloxall Blocking Solution, Palex Medical) 15 min RT<br>HIER Citrat Buffer pH6 (Dako Target Retrieval Solution) 98°C 20 min + 30 min RT                | Overnight 4°C                  | ImmPRESS®-AP -alkaline phosphatase linked-horse anti goat IgG Polymer (Maraval Life Sciences -Vector Laboratories) and a red colored chromogen (ImmPACT Vector Red Substrate Kit Alkaline Phosphatase, Vector Laboratories). |

**Legend:** RT: room temperature; HIER: Heat induced epitope retrieval, min: minutes;
